1 **Barriers to contraceptive use in humanitarian settings:**  
2 **Experiences of South Sudan refugee women living in**  
3 **Adjumani district, Uganda; An exploratory design using**  
4 **qualitative method**

5

6 **Barriers to contraceptive use in humanitarian settings**

7

8 **Authors:**

9 Roselline Achola<sup>1</sup>, Lynn Atuyambe<sup>1</sup>, Elizabeth Nabiwemba<sup>1</sup>, Mathew Nyashanu<sup>2</sup>, Christopher Garimoi  
10 Orach<sup>1</sup>

11 1 Department of Community Health and Behavioural Sciences, College of Health Sciences, Makerere  
12 University, Kampala, Uganda. 2 Department of Health & Allied Professions, School of Social Sciences,  
13 Nottingham Trent University, Nottingham, United Kingdom

14

15 Corresponding author Roselline Achola, Email: [rosellineac@gmail.com](mailto:rosellineac@gmail.com)

16

17 These authors contributed equally to this work

18

19

20

21

22

23

24

25

## 26 **Abstract**

### 27 **Introduction**

28 Family Planning (FP) is a life-saving, empowering and cost-effective interventions for  
29 women and girls. Access to FP is still challenging to female refugees due to several  
30 barriers including language, low educational level, lack of information, influence by  
31 significant others, limited income, desire to replace lost family members, moral values,  
32 cultural and religious norms as well as personal experience with contraceptives side  
33 effects. This study explored barriers to contraceptive use among South Sudan refugee  
34 women living in Adjumani district, Uganda.

### 35 **Methods**

36 An exploratory design using qualitative method was employed involving women  
37 between the ages of 15- 49 years. Purposive sampling was employed to select  
38 participants for Focus Group Discussions (FDGs) and In-depth Interviews (IDIs). Ten  
39 FDGs were conducted, each consisted of 6 to 8 participants. Two groups of females  
40 (15-19 and 20+ years) were reached. Twenty-seven IDIs were conducted with two  
41 similar categories as above. The In-depth interview and focus group discussion guides  
42 were used to collect data. The interviews were recorded verbatim and transcribed  
43 before being translated back to English from the local language. Audio recordings from  
44 the FDGs and IDIs were labelled, transcribed verbatim and translated into English.  
45 Deductive, team-based coding was implemented for codebook development,  
46 Transcripts were entered, and data coded using Atlas ti version 14. Data was analyzed  
47 using content analysis to produce the final outputs for the study.

## 48 **Results**

49 The study found that several challenges to contraception use included gender  
50 dynamics, socially constructed myths on contraceptive use, cultural norms related to  
51 contraceptive use, limited knowledge about contraceptive use, men's negative attitudes,  
52 antagonism of contraceptive use by leaders and reprisal of women who use  
53 contraception.

## 54 **Conclusion**

55 The study concluded that there is need for community strategies to break down the  
56 barriers to contraception utilization among refugee women. Such strategies should  
57 include men and women alongside gatekeepers to enhance sustainability.

## 58 **Introduction**

59 The last twenty-five years have witnessed massive displacement of people due to  
60 political upheavals and natural disasters [1]. This has precipitated the establishment of  
61 refugee settlements in many countries.

62 More so, the displacement and subsequent establishment of refugee settlements is  
63 common in low and middle income countries (LMICs) whose infrastructure and capacity  
64 for support is poor. The refugee population are affected by an array of problems ranging  
65 from economic, socio and cultural due to living in new environments with poor  
66 supporting systems [2]. In addition, family planning is also an urgent need currently  
67 affecting refugee communities considering that family size has a direct impact on family  
68 well-being and support.

69 Family Planning is a life-saving, empowering and cost-effective interventions for women  
70 and girls. However, it remains underfunded with limited prioritization in humanitarian

71 responses with some restrictions by host government on access to services [3]. When  
72 immigrants take refuge in other countries, demand for education, health services,  
73 infrastructure, natural resources, food, land and security concerns are considered key  
74 [4] with lesser prioritization of family planning as a key pillar to improved quality of life for  
75 refugee women of reproductive age.

76 Global standard for Sexual Reproductive Health response in acute emergencies  
77 identified prevention of unintended pregnancies as one of the six objectives under  
78 Minimum Initial Services Package for Sexual Reproductive Health programming (World  
79 Health Organization, 2020). But many women and girls who would like to access Family  
80 planning services have challenges with family decision to allow them to utilize the  
81 services. Family planning, according to World Health Organisation report, 2020 was  
82 defined as a voluntary and informed decision by an individual or couple on the number  
83 of children to have and when to have them. It is characterized by the use of  
84 contraceptive methods that include: female and male sterilization, condoms, injectable,  
85 oral pills, implants, Intra-Uterine Devices (IUD) of both hormonal and Copper T,  
86 Lactation Amenorrhea Method (LAM) among others [5]. Additionally, Family planning  
87 also includes traditional methods comprising of withdrawal, periodic abstinence, basal  
88 body temperature among others [6].

89 The level of accessibility of FP services by refugees in the host country is often affected  
90 by several barriers including language, low educational level, lack of information,  
91 influence by significant others, limited income, desire to replace lost family members,  
92 moral values, certain taboos, cultural norms, religious impediments and personal  
93 experience with contraceptives side effects [7];[8]. In addition, socio-cultural preference

94 and unacceptability of contraception also pose significant barriers to making decision to  
95 use FP [9]. This is more prevalent in many patriarchal societies where men are viewed  
96 as the custodians of the community [10].

97 With global displacement of over 89 million people by war, violence and other forms of  
98 human rights abuses [11], refugee populations have continued to face vulnerabilities  
99 characterized by living in volatile environment and among the people of different cultural  
100 norms that they are not accustomed to. Uganda is the 3<sup>rd</sup> largest refugee-hosting  
101 country in the world and currently host over 1.5 million refugees from neighbouring  
102 countries and beyond [11].

103 These refugees are spread all over the country with a high concentration in the west  
104 Nile and western regions. Over ninety-four percent are living in settlements established  
105 in 12 of Uganda's 135 districts and 6% in Kampala. Of these, (60.5%, n = 964,960)  
106 come from South Sudan and 29.3%, n = 467,004) come from the Democratic Republic  
107 of Congo and others 10.2%, n = 163,441) from Somalia, Burundi, Rwanda, Eritrea,  
108 Ethiopia and Sudan [11]. Of the total number of refugees who come from South Sudan,  
109 about 214,453 live in settlements in Adjumani district (OPM, 2020). Over 80% of the  
110 refugees are women and children. These vulnerable groups need cost effective  
111 interventions for improved Sexual Reproductive Health and Right (SRHR). Although it is  
112 known that a woman's ability to space and limit her pregnancies has a direct impact on  
113 her health and well-being, contraceptive use is still low at 34% in the least developed  
114 countries.

115 South Sudan is one of the countries whose modern contraceptive prevalence rate is  
116 very low at 2.7% with unmet need for FP at 30.8% with maternal mortality ratio of

117 789/100,000 live births [12]. With the health challenges back home in South Sudan  
118 where infrastructure was destroyed during the war with limited economic opportunities,  
119 women still face challenges of limited access and male dominance over their Sexual  
120 Reproductive Health Rights. The women's position is a subordinate one with husbands  
121 being sole decision makers including determining the number of children to be born  
122 [13]. Thus, women are expected to produce as many children as possible in return for  
123 the cows paid as dowry to their parents [14]. The consequences women face when  
124 found using modern FP methods include beating and even separation or divorce. This  
125 exposes women to the barriers to access to FP information and services leading to un  
126 intended pregnancies. Considering all the above assertions this study aimed at  
127 exploring the barriers to contraceptive use in humanitarian settings: challenges and  
128 opportunities for South Sudan refugee women living in Adjumani district, Uganda.

## 129 **Methodology**

### 130 **2.0 Methods**

131

#### 132 **Study design**

133

134 An exploratory design using qualitative method was employed to explore the barriers to  
135 contraceptive use in humanitarian settings for South Sudan refugee women living in the  
136 three settlements in Adjumani district, Uganda. This method is important in  
137 understanding the problem deeper as opposed to finding a final solution to the problem  
138 [15]. Furthermore, the study is guided by the ecological perspective theory which  
139 describes how different levels interact differently to cause an outcome which in this case  
140 is the decision making for FP use among refugees. [16]. Mcleroy added; I quote, "An

141 *ecological perspective on health, emphasizes both individual and contextual systems*  
142 *and the interdependent relations between the two” [16].* The researchers adopted this  
143 theory because decision making on health behavior is central to this study while  
144 behaviour is affected by several levels of influence indicated in the ecological theory  
145 (See fig 1 below). Ecological perspective theory describes how behavior shapes and is  
146 also shaped by the environment in which individuals live [16]. It describes eight theories  
147 and models that explain individual, interpersonal, community behaviour and offers  
148 approaches to solving problems [17] [18]; [19]. The levels of influence include: (1)  
149 intrapersonal/individual factors (2) interpersonal factors (3) community factors (4)  
150 institutional/organizational factors (5) public policy factors. This explains how the  
151 different levels of influence interact towards population health, which in this case is the  
152 use of Family Planning for improved health. **(Fig 1)**

153

#### 154 **Study population and recruitment**

155 This study was conducted in Adjumani district in the three settlements of Pagirinya,  
156 Nyumanzi and Mirieyi. The study participants were women of reproductive age (15- 49  
157 years), both users and non-users of contraceptives. The study participants mainly spoke  
158 Madi and Arabic. In this study, purposeful sampling approach [20] was used to select  
159 participants for FGDs and IDIs with support of community leaders and service providers  
160 from the health facilities. Ten FGDs were conducted overall. Each focus group  
161 consisted of 6 to 8 participants. The groups of females reached were of ages 15-19 and  
162 above 20 years. Twenty-seven IDIs were conducted with similar categories of  
163 participants.

## 164 **Piloting the interview schedules**

165 Whereas the research assistants were knowledgeable and familiar with study area and  
166 the local languages, they were trained on the basics of qualitative research and taken  
167 through the tools. Having identified the 3 settlements with their host communities, the  
168 pre – testing of the tools was done in Agojo settlement and its host community in the  
169 same district. Purposive sampling was used to recruit participants who took part int the  
170 FGDs and IDIs. The research participants were asked about the clarity of the questions  
171 which they confirmed to be clear, thus the researchers adopted the interview guides  
172 without much alteration.

## 173 **Data collection**

174  
175 The interview schedule was translated into the local languages to facilitate  
176 understanding of the questions by the research participants. Research assistance were  
177 utilized to collect data from the research participants. The Research assistants who  
178 were recruited to help with data collection were able to speak the local languages which  
179 included Dinka, Madi and Arabic. They were trained on qualitative research methods  
180 and the use of tools by taking them for field pre- testing in similar settings. Data was  
181 collected using two interview guides. The In-depth interview and focus group discussion  
182 guides. The interviews were recorded verbatim and transcribed before being translated  
183 back to English from the local language.

## 184 **Data Analysis**

185



186 Audio recordings from the FGDs and IDIs were labelled, transcribed verbatim,  
187 translated into English by experienced research assistants who were fluent in Madi and  
188 Arabic as the main languages and the recordings stored. Deductive, team-based coding  
189 was implemented for codebook development, Transcripts were entered and data coded  
190 using Atlas version 14. Data was analyzed using content analysis. To ensure reliability,  
191 coding was done by three research experts led by the Principle Investigator. They read  
192 the transcripts, discussed emerging issues and agreed on common themes. The team  
193 selected two transcripts, each one read through, assigned different meaning to each  
194 response and developed a codebook following Braun and Clarke procedure [21]. On  
195 completion, they met on zoom and discussed the descriptive codes to come up with a  
196 unified code book. While coding, there were interactive discussions arising from the  
197 discrepancies and disagreements that were resolved by having same meaning of the  
198 codes before moving to next step.

## 199 Ethics statement

200

201 This study was approved by Higher Ethical Degree Review Committee of Makerere  
202 University School of Public Health (25<sup>th</sup> March 2021) and the Uganda National Council  
203 of Science and Technology. Written permission was also obtained from Office of the  
204 Prime Minister (19<sup>th</sup> April, 2021), Kampala and in Adjumani Sub Office. All the research  
205 participants read the information sheet and signed a consent form, which granted them  
206 the right to withdraw from the study at any time without giving reasons.

## 207 Results

208

209 Following data analysis, the study found that the challenges to contraception use

210 included gender dynamics, socially constructed misconceptions on contraceptive use,  
211 cultural norms related to contraceptive use, limited knowledge about contraceptive use,  
212 men's negative attitudes, the antagonism of contraceptive use by leaders and The  
213 reprisal following contraceptive use.

## 214 **1. Gender dynamics**

215

### 216 **1.1 Joint decision by couple against contraceptive use**

217 The research participants in the refugee settings viewed contraceptive use as a barrier  
218 to getting the many cows in form of bride price that comes with a girl child. Families that  
219 produce many girls are assured of big gains in form of dowry. Therefore, participants  
220 reaffirmed that couples do agree jointly not to use contraception and have as many girls  
221 as possible to reap the benefits of dowry.

222 *"...the problem is that every man tells the wife about the need for many cows and the*  
223 *easiest way is give birth to more girls which your contraceptives will deter them from*  
224 *achieving..."* (IDI\_Female\_20+\_Adjumani\_Nyumanzi\_settlement).

225 *"...Back home in South Sudan, we even don't use contraceptives because what we*  
226 *want is to give birth to many children. This is the reason why we don't want to know*  
227 *more about your family planning. In our tribes, we face poverty due to lack of dowry, so*  
228 *we need more girls to get out of poverty..."* (FGD\_female 20+  
229 \_Adjumani\_Mirieyi\_settlement - Dinka only).

### 230 **1.2 Limited women empowerment**

231 The research participants acknowledged that women who are less empowered are un  
232 able to convince their husbands about the intention to use contraceptives. They

233 reported that personal decision is only possible for women who are economically  
234 empowered and are able to sustain themselves and provide basic needs should the  
235 husband discover that they are using any contraceptives.

236 *“...you see these men of ours they don't want this family planning, they say it will*  
237 *damage people and its dangerous for women to use even though you share with them*  
238 *the benefits of Family Planning, for them they will disagree and even become furious...”*

239 (IDI \_Female 20+\_ Adjumani\_Pagirinya Settlement)

240 *“...if you are very weak the husband will chase you away from that home...”* (IDI\_  
241 female\_ 20+\_Pagirinya\_Adjumani\_settlement).

### 242 1.3 Patriarchal dominance of men

243 The research participants reported influence of men in making decision on  
244 contraceptive use. They further reported that women find it hard to make decision to  
245 start on a contraceptive without husband involvement apart from doing it stealthily which  
246 also has negative consequences. They acknowledged that men were the custodians of  
247 decision making in their communities and key actors in determining family size and  
248 family planning use.

249 *“...Because my husband was aware that my mother made decision for me to start on*  
250 *family planning methods without his consent, he said that if I fall sick in his house, I*  
251 *should go to my mother who should take care of me moving forward....”* IDI \_Female

252 20+\_ Adjumani\_Pagirinya\_Settlement

253 *“...I witnessed a sad moment when my neighbor made her decision to go to hospital*  
254 *and was given this method of inserting on the arm, how do you call it? Implant yeah. But*  
255 *when this woman got sick, while the husband tried to support her, he felt the implant*

256 *under her arm. He immediately rushed to hospital with her and commanded that the*  
257 *implant be removed off the wife's arm as he was looking..." IDI*

258 *\_Female\_20+\_Adjumani\_Pagirinya\_Settlement.*

#### 259 **1.4 Mistaking contraceptive use for promiscuity**

260 The research participants reported that many husbands and parents of young women  
261 believed that women who use contraception are promiscuous. Furthermore, they  
262 alleged that the community views contraceptive use as a cover up for promiscuity, thus  
263 strongly oppose its use by both women and girls.

264 *"...yes, it is now more of a culture in the Dinka tribe, that women who are using*  
265 *contraception when the community gets to know, they will be labeled women who don't*  
266 *want to produce because they are prostitutes. This has discouraged more women from*  
267 *using contraceptives even when they have genuine reasons..." (FGD- Female*  
268 **20\_Adjumani\_Pagirinya\_settlement)**

269  
270 *Most parents don't want their young girls to use contraceptives, saying the girls want to*  
271 *become prostitutes by covering up with prevention of pregnancy. IDI- Female*  
272 **20+\_Adjumani\_Pagirinya\_settlement**

## 273 **2. Socially constructed myths and misconceptions about** 274 **contraceptive use**

275 Research participants reported that in their communities, people have negative  
276 perceptions about contraceptive use. They reported that contraceptives cause cancer,  
277 infertility, fibroids, burn the ovary, damage the female eggs and even lead to giving birth  
278 to deformed child. Furthermore, they claimed that children born with deformities are as

279 a result of using a contraception. They also reported that perceived beliefs that are  
280 related to myths and misconceptions demoralize most women who might be considering  
281 using contraceptives.

282 *"... I think if women are not determined due to the myths that go around about various*  
283 *contraceptive methods, no one would probably use given the negative forces that come*  
284 *your way. People say that Depo causes cancer, fibroids among others..." (IDI\_Female*  
285 *20+\_Mirieyi\_settlement)*

286 Research participants added that some parents claim that Family Planning use among  
287 young people is very bad. They reported that when girls who are not yet married use  
288 contraceptives, they may not have children for the rest of their lives in addition to  
289 deformed babies.

290 *"...They also say that they may have babies with missing body parts. So, any*  
291 *abnormality is associated with use of modern Family Planning. Even those who don't*  
292 *produce after marriage are labelled as having used Family Planning at early age. (IDI-*  
293 *Female 20+\_Adjumani\_Pagirinya\_refugees)*

#### 294 Cultural norms related to contraceptive use

295 Most of the research participants reported that women are married to have as many  
296 children as they can until when they naturally reach menopause. Thus, failure to have  
297 the desired number of children can tantamount to disciplinary action against the woman  
298 because it contravenes the cultural beliefs and norms on big family size.

299 *it's there, cultural belief that husbands would tell their wives that I brought you to my*  
300 *home here to produce children and you cannot stop before your age.*

301 IDI\_female\_20+\_Adjumani\_Pagirinya\_settlement.

302 *“...even now you just see people they are fearing family planning and if you go in*  
303 *communities, the fellow women just laugh at you saying this one doesn't want to*  
304 *produce. what's wrong with this woman... laughing even if you talk to them they*  
305 *continue looking at you as one who doesn't want to produce...”* IDI\_ Female-  
306 *\_20+\_Adjumani\_Nyumanzi\_Settlement.*

### 307 **3. Limited knowledge about contraceptive methods**

308 The participants reported that contraceptive information is not widely known by the  
309 refugee communities. Additionally, they acknowledged that there was lack of health  
310 promotion messages that promoted family planning back home in South Sudan.

311 *“...I don't use family planning because I don't know more about it. No one comes to talk*  
312 *to us in the settlements here about the use of family planning...”*

313 (FGD\_Women\_20+\_Adjumani\_Mirieyi\_Settlement\_DINKA)

314 *“...things would be different because here in Adjumani, one can mention anything about*  
315 *contraceptive which is not the same case back home in South Sudan...”* (Female  
316 FGD\_20+\_Adjumani\_Pagirinya\_ settlement).

### 317 **4. Men's negative attitudes about contraceptives**

318 The research participants reported that their main barrier to use contraception is due to  
319 negative attitudes of men about family planning. They added that men think that their  
320 women will stop producing.

321 *“...you see these men of ours don't want this family planning, they say it will damage*  
322 *people and its dangerous for women to use even though you share with them the*

323 *benefits of Family Planning, for them they will disagree and disagree and start*  
324 *quarrelling...*” IDI **\_Female20+\_Adumani\_Pagirinya\_Settlement.**

325 Surprisingly, research participants added that this negative attitude by men have also  
326 influenced the way women now perceive family planning. They reported that women  
327 also speak negatively about use of contraception.

328 “...*But for women who listen to their husbands have also developed negative attitudes*  
329 *about family planning. They discourage other women, saying that family planning*  
330 *method is not good because women may give birth to a child who is dormant (with*  
331 *mental retardation), lame (with deformity) ...*” IDI  
332 **\_Female\_20+\_Adjumani\_Pagirinya\_Settlement.**

## 333 **5. Antagonism against contraceptive use by leaders and men**

334 The research participants reported that, there was a deliberate effort by the community  
335 leaders to antagonize family planning programs within the settlements. They  
336 continuously advocate for many children to build a stronger and bigger society, claiming  
337 that conflict back home disentangled their families that must be rebuilt with new  
338 generation. The participants added that their leaders have a fear of losing the entire  
339 generation and is the reason why they antagonize family planning programs for  
340 refugees. The research participants also reported that children are viewed as source of  
341 prestige and security. Therefore, more children are needed.

342 “...*it’s common in Madi or any culture among us refugees that we are interested in*  
343 *replacing our lost people. Therefore, we need to give birth to many children who will be*  
344 *going to occupy our land back in South Sudan. Even if you go back there, that land is*  
345 *now open no people. Thy are just advising women to produce as many children as they*

346 *can...* (IDI female\_ 20+\_ Adjumani\_Pagirinya\_Settlement).

347 *"...South Sudane man with a woman who has given birth to less than five children and*  
348 *was not conceiving again, the clan leaders force the man to marry another wife because*  
349 *more children are needed..." IDI female 20 and above Pagirinya settlement*

## 350 **6. The reprisal following contraceptive use**

351 The research participants reported that women who went ahead to use contraceptives  
352 when their husbands and other family members had rejected the decision, received  
353 some reprisals. They asserted that it was safer when the husbands and family members  
354 remained ignorant about their contraceptive decision.

355 *"... Some women are neglected by husband without any social support. This will also*  
356 *cause hatred between wife and husband in the homes causing unnecessary tension*  
357 *and worse of all, separation where the husband chases away the woman from his home*  
358 *due to anger..."* (FGD \_Female 20+\_Adjumani\_Nyumanzi\_Settlement)

359 *"...And the worse of all may lead to separation where the husband chases away the*  
360 *woman from his home..."*

361 (FGD \_Female 20+\_Adjumani\_Mirieyi\_Settlement)

## 362 **Discussions**

363 Gender dynamics plays a very important role in many patriarchal societies ranging from  
364 influence of health behavior to decision making on critical issues [22]. In this research  
365 gender dynamics was found to influence the decisions taken against contraceptive use  
366 by couples, low empowerment of women to use contraception and patriarchal  
367 dominance of men in making contraceptive choices[23]. Commercialization of the girl



368 child through marriage and dowry payment is not new in many low- and middle-income  
369 countries [24]. This has had a push-on effect on the aspiration of couples to jointly  
370 agree to have as many girl children as possible in anticipation of monetary value  
371 through marriage and subsequent dowry. This research found that in the refugee  
372 settings participants viewed contraceptive use as a barrier to getting the many cows in  
373 form of bride price that comes with a girl child. Families that produced many girls were  
374 assured of big gains in form of dowry. Therefore, participants reaffirmed that couples do  
375 agree jointly [25] not to use contraception so as to have as many girls as possible to  
376 reap the benefits of dowry. Considering the above assertions there is need for the  
377 ministry of health in conjunction with non-governmental organizations to roll out health  
378 promotion awareness on the benefits of family planning and the need to respect the  
379 integrity of the girl child. Such a strategy may also be effective if men are also involved  
380 in critical issues regarding contraception.

381 Empowerment of women has always been a very important and critical issue to offer  
382 women a space to make decision on what impacts on their health [26]. Empowered  
383 women are likely to be independent and fearless to make a decision that addresses  
384 their needs which has been mistaken for disobedience in many patriarchal societies.  
385 This research found that women who are less empowered are unable to convince their  
386 husbands about the intention to use contraceptives. They reported that personal  
387 decision is only possible for women who are economically empowered and can sustain  
388 themselves and provide basic needs should the husband discover that they are using  
389 any contraceptives. Considering the above assertions, there is a need for government  
390 to roll out assertiveness training among women including running the training alongside

391 economic empowerment projects for women [1]. Furthermore, it is also important that  
392 men who already view themselves as the custodians of the community and central to  
393 decision making are also included the women empowerment awareness programme.  
394 This will help them to appreciate the benefits of an empowered woman not only to the  
395 family but also to the community.

396 In most patriarchal societies, men have dominated all decisions that pertains to family  
397 matters [27]. This male dominance has further exacerbated the vulnerability of women  
398 and girls affecting their access to health services. In some circumstance for women to  
399 access certain health services they must first get approval from their partners [28]. Due  
400 to the subordinate situation of the refugee women, they continuously experience  
401 barriers to accessing contraceptives. This study revealed that women could not make  
402 their own decision to use contraceptive because of male influence against the idea. The  
403 community leaders who are predominantly men are fully aware of this and are also  
404 enjoying the monopoly of making decisions on what type of healthcare should be  
405 accessed by women. They acknowledged that men 'are regarded as the custodians of  
406 the community and have a responsibility of taking important decisions for their  
407 communities [29], thus, any decision made by women is rejected. Drawing from the  
408 above findings, this study recommends a tailored community intervention to be  
409 designed together with community leaders, men and women to create awareness on  
410 the rights of every individual particularly right to health. This will help to address the  
411 subordinate positions of women that has affected their lives for a long period of time. In  
412 doing so, they may appreciate and steer the process of re considering the rules  
413 governing patriarchy while at the same time allow women to take part in decision

414 making especially about their health needs.

415 Use of contraceptives is aimed at achieving pregnancy prevention. However, in some  
416 communities, it is perceived as a characteristic of promiscuity [30]; [31]; [32]. The  
417 different cultural norms that have along viewed contraceptive use as synonymous to  
418 promiscuity have led to many refugee women fearing to access the service [30]. This  
419 study revealed that many husbands and parents of young women believed that women  
420 who used contraception are promiscuous. They added that the community viewed  
421 contraceptive use as a cover up for women's intentions to engage in sexual  
422 relationships with other men outside their marital life, [32]. Given these concerns, there  
423 is need to clearly draw a line between pregnancy prevention particularly for child  
424 spacing and the community views on risk sexual behaviour. Pre packed messages  
425 showing benefits of family planning to baby, mother, father, community and government  
426 as a whole should be considered. This should be related to the harnessing of the  
427 Demographic Dividend that shows how fertility reduction will enhance dependency ratio  
428 and lead to saving that will benefit the family to be able to invest.

429 Contraceptive use has for a long period been perceived differently by many  
430 communities across the world [33]. The various myths and misconceptions have  
431 impacted negatively on the uptake of family planning programs in many African  
432 countries [30]; [31]; [34]. Although many, scholars and practitioners have written and  
433 talked about these issues, some communities including the refugee populations still  
434 strongly believe in these myths related to ill health, poor pregnancy outcome and fertility  
435 challenges among others [35]. In this study, participants reported that contraceptive use  
436 led to children being born with deformities which has deterred some refugee women

437 from making decision to use contraceptives. Owing to the above findings, this study  
438 suggests that there is need for the central government through the Ministry of  
439 Health and key humanitarian stakeholders to raise awareness about family planning  
440 within communities to dispel these myths and misconceptions. The awareness can take  
441 the form of dialogue with the communities to allow for questions and answers. These  
442 dialogues will provide space for both women and men to build a more supportive  
443 environment to interact with providers in addressing these myths. This approach will  
444 help address the challenges, answer questions from the community.

445 Cultural norms and values have a direct impact on the uptake of health services thus  
446 the impact may be positive or negative [36]. In many communities across Africa women  
447 who use contraceptives are viewed as weak and fear to raise children which is against  
448 what a woman is expected in the community [29]. This research found that the research  
449 participants believed that women were married to have as many children as they could  
450 without any interference of contraceptives. Furthermore, women were expected to give  
451 birth until menopause and to have a big family. Due to these strong cultural norms,  
452 women who fail to have the desired number of children are subjected to disciplinary  
453 action like being chased out of the matrimonial home or beaten [29]. Considering the  
454 assertions above, this study therefore recommends that the Central Government  
455 through the Ministry of Health and humanitarian organization working in the refugee  
456 settlements roll out a health promotion campaign to enlighten community leaders and  
457 men in general on the cultural issues that impact on the uptake of women contraceptive  
458 use. Such an initiative can help in attitude change and increase the uptake of  
459 contraception among refugee communities.

460 Limited knowledge about contraceptive methods have been found as barrier for  
461 decision making in general [30]; [34];[37]. The population under study come from a  
462 community where sensitization on family planning was never a government priority. It is  
463 clear that when people do not know about a service or have limited knowledge about it,  
464 they would not seek to use the service, [25]. The participants in this study reported that  
465 contraceptive information is not widely known or disseminated in their settlements.  
466 Additionally, they acknowledged that there was lack of health promotion messages that  
467 promoted family planning back home in South Sudan. Therefore, it is important for  
468 humanitarian organisation working with refugees to equip them with information on  
469 contraception. This study further recommends that the central government through the  
470 Ministry of Health and Adjumani district should come up with appropriate ways of  
471 disseminating family planning messages in the refugee settlements by working with  
472 community leaders and community health workers in the community.

473 Reprisal following contraceptive use is one of the ways in which men can restrict the  
474 uptake of certain health care services by women for example sexual reproductive health  
475 desires [29]; [34]. Such reprisals may involve neglecting women by leaving them without  
476 any social support thereby making them vulnerable considering their socio-economic  
477 status in the community [37]. Most families have fallen apart due to disagreements on  
478 contraceptive use, impacting negatively on the lives of children and the women  
479 themselves due to intimate partner violence [38]. Persistent gender norms have affected  
480 uptake of health services amongst young women leading to fear [39]. This research  
481 found that women who went ahead and used contraceptives without approval of their  
482 husbands and/or family members received some reprisals in form beating or

483 separation/divorce. The refugee women believed that use of contraceptives was safer  
484 when the husbands and family members were not aware. Considering the above fears,  
485 interpersonal communication should be designed for men, women, local leaders to  
486 uphold the dignity of women in relation seeking health services. The men should also be  
487 sensitized about the consequences of intimate partner violence if they were acting out  
488 of ignorance. This will help them to appreciate the law and its implication on intimate  
489 partner violence while accepting contraceptive use by their women.

## 490 **Implication for practice**

491  
492 There is need for a multidisciplinary approach to combatting barriers to contraception  
493 use among refugee communities. Professionals from different organizations and  
494 departments need to be educated and trained to understand the culture of refugee  
495 communities and effectively help in promoting access to contraception services. More  
496 importantly there is need for a robust health promotion programme targeting both men  
497 and women in the refugee communities. Such a health promotion initiative should also  
498 be supported and conducted by people within the refugee communities to enhance  
499 acceptability. More conversations are needed with refugee women and men to  
500 understand the best ways of caring for the women and tap into opportunities available to  
501 break the barriers to contraceptive use. Such engagement may be key to finding lasting  
502 solutions in ending opposition to contraceptive use among refugee communities. There  
503 is need to adopt locally appropriate approaches and interventions to deliver health  
504 promotion to contraceptive awareness and paying attention to concept of social justice  
505 and recognition of local knowledge and values.

## 506 **Limitation of the study**

507 The research participants were drawn from one district in Uganda in this case Adjumani.  
508 Future research encompassing several districts hosting refugees in Uganda will be  
509 needed to enhance comparisons. Furthermore, the research study was limited to only a  
510 qualitative research paradigm. However, future studies using both qualitative and  
511 quantitative research paradigms will be needed to explore the research issues from  
512 different epistemological and ontological positions.

## 513 **Conclusion and recommendation**

514 Several constrains negatively affected the use of contraception among South Sudanese  
515 refugee women living in Uganda. This calls for community friendly strategies to break  
516 down the barriers to contraception utilization among refugee women. Such strategies  
517 should include both men and women alongside the community leaders to enhance  
518 sustainability. Acknowledgement of the values, knowledge and ethos of the refugee  
519 communities should be recognized to build a formidable relationship with the community  
520 leaders while selling the benefits of family planning at community level. More  
521 importantly, robust policies supporting family planning among refugee communities are  
522 needed to ensure that the public is aware of the need to engage with the family planning  
523 services and improve the women s' health.

524 **Declaration**

525 **Conflict of interest**

526 All authors declare no conflict of interest

527 **Funding**

528 **Grant ID:** NICHE -UGA-288. This research was conducted with financial support  
529 from Nuffic grant through The International Institute of Social Studies Erasmus  
530 University, Rotterdam for Strengthening Education and Training Capacity in Sexual  
531 Reproductive Health & Rights in Uganda (SET-SRHR).

532 **Funding to authors**

533 Funding was only availed to RA, the Principal Investigator through Nuffic grant through  
534 The International Institute of Social Studies Erasmus University, Rotterdam for  
535 Strengthening Education and Training Capacity in Sexual Reproductive Health & Rights  
536 in Uganda (SET-SRHR). The funders had to role in the study design, data collection  
537 and analysis, decision to publish or preparation of the manuscript.

538 **Acknowledgements**

539 We are grateful to all refugee women who took part in this research study and the  
540 research assistants for data collection. Special thanks go to my supervisors for the  
541 continued support.



542 **Author Contributions**

543 **Conceptualization:** Roselline Achola (RA), Christopher Garimoi Orach (CGO), Lynn  
544 Atuyambe (LA) and Elizabeth Nabiwemba (EN)

545 **Formal analysis:** RA, CGO and Mathew Nyashanu (MN)

546 **Funding acquisition:** Ra, CGO, LA and EN

547 **Investigation:** RA, CGO, LA, EN and MN

548 **Methodology:** RA, CGO, LA, EN and MN

549 **Project administration:** Olivia Nakisita; **Software:** RA and Tenywa Ronald

550 **Supervision:** RA, CGO, LA and EN

551 **Validation:** RA, CGO, LA, EN and MN

552 **Visualization:** RA

553 **Writing – original draft:** RA, CGO, MN; **Writing – review & editing:** RA, CGO, LA, EN  
554 and MN

555

556

557 **Reference**

558 [1] S. Bashford-Squires, L. Gibson, and M. Nyashanu, “Mitigating  
559 Gender-Based Violence Through the Economic Empowerment of  
560 Women: A Case Study of the Teso Sub-Region in Uganda,” in  
561 *Indigenous Methodologies, Research and Practices for Sustainable  
562 Development*, M. F. Mbah, W. Leal Filho, and S. Ajaps, Eds. Cham:

- 563 Springer International Publishing, 2022, pp. 371–391.
- 564 [2] V. M. Mutambara, T. L. Crankshaw, and J. Freedman, “Assessing the  
565 Impacts of COVID-19 on Women Refugees in South Africa,” *J. Refug.  
566 Stud.*, vol. 35, no. 1, pp. 704–721, 2022, doi: 10.1093/jrs/feab044.
- 567 [3] R. Jeffries *et al.*, “The health response to the Rohingya refugee crisis  
568 post August 2017: Reflections from two years of health sector  
569 coordination in Cox’s Bazar, Bangladesh,” *PLoS One*, vol. 16, no. 6,  
570 pp. 1–15, 2021, doi: 10.1371/journal.pone.0253013.
- 571 [4] M. P. Gomez and A. Christensen, “The Impacts of Refugees on  
572 Neighboring Countries: A Development Challenge,” *World Dev. Rep.*,  
573 pp. 1–26, 2011.
- 574 [5] S. Anand and T. Bärnighausen, “Health workers at the core of the  
575 health system: Framework and research issues,” 2011, doi:  
576 10.1016/j.healthpol.2011.10.012.
- 577 [6] A. Austin, “Unmet contraceptive need among married Nigerian  
578 women: An examination of trends and drivers,” *Contraception*, vol. 91,  
579 no. 1, pp. 31–38, 2015, doi: 10.1016/j.contraception.2014.10.002.
- 580 [7] L. Nasr and R. P. Fisk, “The global refugee crisis: how can  
581 transformative service researchers help?,” *Serv. Ind. J.*, vol. 39, no. 9–

- 582 10, pp. 684–700, 2019, doi: 10.1080/02642069.2018.1445224.
- 583 [8] S. A. JOHNSON, M. N. KAGGWA, and E. V. A. LATHROP, “How It  
584 Started, and How It’s Going: Global Family Planning  
585 Programs,” *Clinical Obstetrics and Gynecology*, vol. 64, no. 3. pp.  
586 422–434, [Online]. Available:  
587 [https://www.ingentaconnect.com/content/wk/cobg/2021/00000064/000](https://www.ingentaconnect.com/content/wk/cobg/2021/00000064/00000003/art00005)  
588 [00003/art00005](https://www.ingentaconnect.com/content/wk/cobg/2021/00000064/00000003/art00005).
- 589 [9] D. Sapkota, S. R. Adhikari, T. Bajracharya, and V. P. Sapkota,  
590 “Designing Evidence-Based Family Planning Programs for the  
591 Marginalized Community: An Example of Muslim Community in  
592 Nepal,” *Front. Public Heal.*, vol. 4, no. June, pp. 1–10, 2016, doi:  
593 10.3389/fpubh.2016.00122.
- 594 [10] M. Nyashanu, T. Tsopotsa, S. N. Mbalinda, G. North, M. Mguni, and  
595 N. S. Nyashanu, “The potential impact of COVID 19 on poor and  
596 conflict-ridden communities in Sub-Sahara Africa (SSA): A conceptual  
597 paper,” *Greenwich Soc. Work Rev.*, vol. 1, no. 2, pp. 125–132, 2020,  
598 doi: 10.21100/gswr.v1i2.1156.
- 599 [11] UNHCR, “Global Appeal 2022,” 2022.
- 600 [12] M. P. R. Festin *et al.*, “Moving towards the goals of FP2020 —

- 601 classifying contraceptives,” *Contraception*, vol. 94, no. 4, pp. 289–294,  
602 2016, doi: 10.1016/j.contraception.2016.05.015.
- 603 [13] I. Moshia, R. Ruben, and D. Kakoko, “Family planning decisions,  
604 perceptions and gender dynamics among couples in Mwanza,  
605 Tanzania: A qualitative study,” *BMC Public Health*, vol. 13, no. 1,  
606 2013, doi: 10.1186/1471-2458-13-523.
- 607 [14] S. Kane, M. Kok, M. Rial, A. Matere, M. Dieleman, and J. E. Broerse,  
608 “Social norms and family planning decisions in South Sudan,” *BMC*  
609 *Public Health*, vol. 16, no. 1, pp. 1–12, 2016, doi: 10.1186/s12889-  
610 016-3839-6.
- 611 [15] B. A. Jones, H. Buchanan, and D. Harcourt, “The experiences of older  
612 adults living with an appearance altering burn injury: An exploratory  
613 qualitative study,” *J. Health Psychol.*, vol. 22, no. 3, pp. 364–374,  
614 2017, doi: 10.1177/1359105315603473.
- 615 [16] K. R. Mcleroy, D. Bibeau, A. Steckler, and K. Glanz, “An Ecological  
616 Perspective on Health Promotion Programs,” *Heal. Educ. Behav.*, vol.  
617 15, no. 4, pp. 351–377, 1988, doi: 10.1177/109019818801500401.
- 618 [17] M. Ahlberg, “Editorial,” *Sex. Reprod. Healthc.*, vol. 31, pp. 7–8, 2022,  
619 doi: 10.1016/j.srhc.2022.100705.

- 620 [18] C. Dalessandro, J. Kaiser, and J. N. Sanders, "Reproductive  
621 autonomy and feelings of control over pregnancy among emerging  
622 adult clients in a Utah (USA) contraceptive initiative study," *Sex.  
623 Reprod. Healthc.*, vol. 31, no. April 2021, p. 100688, 2022, doi:  
624 10.1016/j.srhc.2021.100688.
- 625 [19] L. W. Green, L. Richard, and L. Potvin, "Ecological foundations of  
626 health promotion," *American Journal of Health Promotion*, vol. 10, no.  
627 4. pp. 270–281, 1996, doi: 10.4278/0890-1171-10.4.270.
- 628 [20] L. A. Palinkas, S. M. Horwitz, C. A. Green, J. P. Wisdom, N. Duan,  
629 and K. Hoagwood, "Purposeful Sampling for Qualitative Data  
630 Collection and Analysis in Mixed Method Implementation Research,"  
631 *Adm. Policy Ment. Heal. Ment. Heal. Serv. Res.*, vol. 42, no. 5, pp.  
632 533–544, 2015, doi: 10.1007/s10488-013-0528-y.
- 633 [21] V. Braun and V. Clarke, "Using thematic analysis in psychology," *Qual  
634 Res Psychol*, vol. 3, pp. 77–101, 2006, doi:  
635 10.1191/1478088706qp063oa.
- 636 [22] F. O. Olanrewaju *et al.*, "Insurgency and the Invisible Displaced  
637 Population in Nigeria: A Situational Analysis," *SAGE Open*, vol. 9, no.  
638 2, 2019, doi: 10.1177/2158244019846207.

- 639 [23] H. Lusey, M. San Sebastian, M. Christianson, and K. E. Edin,  
640 “Prevalence and correlates of gender inequitable norms among  
641 young, church-going women and men in Kinshasa, Democratic  
642 Republic of Congo,” *BMC Public Health*, vol. 18, no. 1, pp. 1–12,  
643 2018, doi: 10.1186/s12889-018-5742-9.
- 644 [24] V. D. W. Fakult, G. Wilhelm, and L. Universit, “Essays on Physical and  
645 Financial Well-being in Low- and Middle-income Countries,” no.  
646 September 1995, 2022.
- 647 [25] S. Lateef *et al.*, “Assessing the Use of Contraceptive Methods for  
648 Family Planning among Married Women of Rawalpindi [urban],” *World  
649 Fam. Med. J. /Middle East J. Fam. Med.*, vol. 20, no. 1, pp. 59–65,  
650 2022, doi: 10.5742/mewfm.2022.9525098.
- 651 [26] N. Varghese and N. Kumar, “Feminism in advertising: Irony or  
652 revolution? A critical review of femvertising,” *Fem. Media Stud.*, vol.  
653 22, no. 2, pp. 441–459, 2022, doi: 10.1080/14680777.2020.1825510.
- 654 [27] I. Mejía-Guevara, B. Cislighi, and G. L. Darmstadt, “Men’s Attitude  
655 Towards Contraception and Sexuality, Women’s Empowerment, and  
656 Demand Satisfied for Family Planning in India,” *Front. Sociol.*, vol. 6,  
657 no. December, pp. 1–14, 2021, doi: 10.3389/fsoc.2021.689980.

- 658 [28] L. W. Ruderman, C. Packer, A. Zingani, P. Moses, and H. M. Burke,  
659 “Men can take part’: examining men’s role in supporting self-  
660 injectable contraception in southern Malawi, a qualitative exploration,”  
661 *Reprod. Health*, vol. 19, no. 1, pp. 1–11, 2022, doi: 10.1186/s12978-  
662 022-01476-w.
- 663 [29] N. Kapadia-Kundu *et al.*, “Applying a gender lens to social norms,  
664 couple communication and decision making to increase modern  
665 contraceptive use in Ethiopia, a mixed methods study,” *Reprod.*  
666 *Health*, vol. 19, no. 1, pp. 1–15, 2022, doi: 10.1186/s12978-022-  
667 01440-8.
- 668 [30] S. Ontiri, L. Mutea, V. Naanyu, M. Kabue, R. Biesma, and J.  
669 Stekelenburg, “A qualitative exploration of contraceptive use and  
670 discontinuation among women with an unmet need for modern  
671 contraception in Kenya,” *Reprod. Health*, vol. 18, no. 1, pp. 1–10,  
672 2021, doi: 10.1186/s12978-021-01094-y.
- 673 [31] C. Akoth, J. O. Oguta, and S. M. Gatimu, “Prevalence and factors  
674 associated with covert contraceptive use in Kenya: a cross-sectional  
675 study,” *BMC Public Health*, vol. 21, no. 1, pp. 4–11, 2021, doi:  
676 10.1186/s12889-021-11375-7.

- 677 [32] J. Mwaisaka *et al.*, “Exploring contraception myths and  
678 misconceptions among young men and women in Kwale County,  
679 Kenya,” *BMC Public Health*, vol. 20, no. 1, pp. 1–10, 2020, doi:  
680 10.1186/s12889-020-09849-1.
- 681 [33] S. Kaur and P. D. Blumenthal, “Global myth busting in family  
682 planning.,” *Curr. Opin. Obstet. Gynecol.*, vol. 33, no. 6, pp. 458–462,  
683 Dec. 2021, doi: 10.1097/GCO.0000000000000757.
- 684 [34] K. Ackerson and R. Zielinski, “Factors influencing use of family  
685 planning in women living in crisis affected areas of Sub-Saharan  
686 Africa: A review of the literature.,” *Midwifery*, vol. 54, pp. 35–60, Nov.  
687 2017, doi: 10.1016/j.midw.2017.07.021.
- 688 [35] K. Jonas, Z. Duby, K. Maruping, J. Harries, and C. Mathews,  
689 “Rumours, myths, and misperceptions as barriers to contraceptive use  
690 among adolescent girls and young women in South Africa,” *Front.*  
691 *Reprod. Heal.*, vol. 4, pp. 1–24, 2022, doi: 10.3389/frph.2022.960089.
- 692 [36] S. Krishnaratne *et al.*, “Acceptability of family planning in a changing  
693 context in Uganda: A realist evaluation at two time points,” *BMJ Open*,  
694 vol. 12, no. 4, pp. 1–13, 2022, doi: 10.1136/bmjopen-2021-054277.
- 695 [37] M. A. Potasse and S. Yaya, “Understanding perceived access barriers



696 to contraception through an African feminist lens: a qualitative study in  
697 Uganda,” *BMC Public Health*, vol. 21, no. 1, pp. 1–13, 2021, doi:  
698 10.1186/s12889-021-10315-9.

699 [38] C. R. Young, D. M. Arnos, L. T. Matthews, and M. G. Hospital,  
700 “violence in sub-Saharan African healthcare,” vol. 14, no. 9, pp. 1335–  
701 1346, 2020, doi: 10.1080/17441692.2019.1567802.A.

702 [39] J. Nalukwago *et al.*, “Gender norms associated with adolescent sexual  
703 behaviours in Uganda,” *Int. Soc. Sci. J.*, vol. 69, no. 231, pp. 35–48,  
704 2019, doi: 10.1111/issj.12203.

705

1 **Figure 1: Different interactions between different levels**  
 2 **to cause an outcome of decision making for Family**  
 3 **Planning use. Adopted from Ecological perspective**

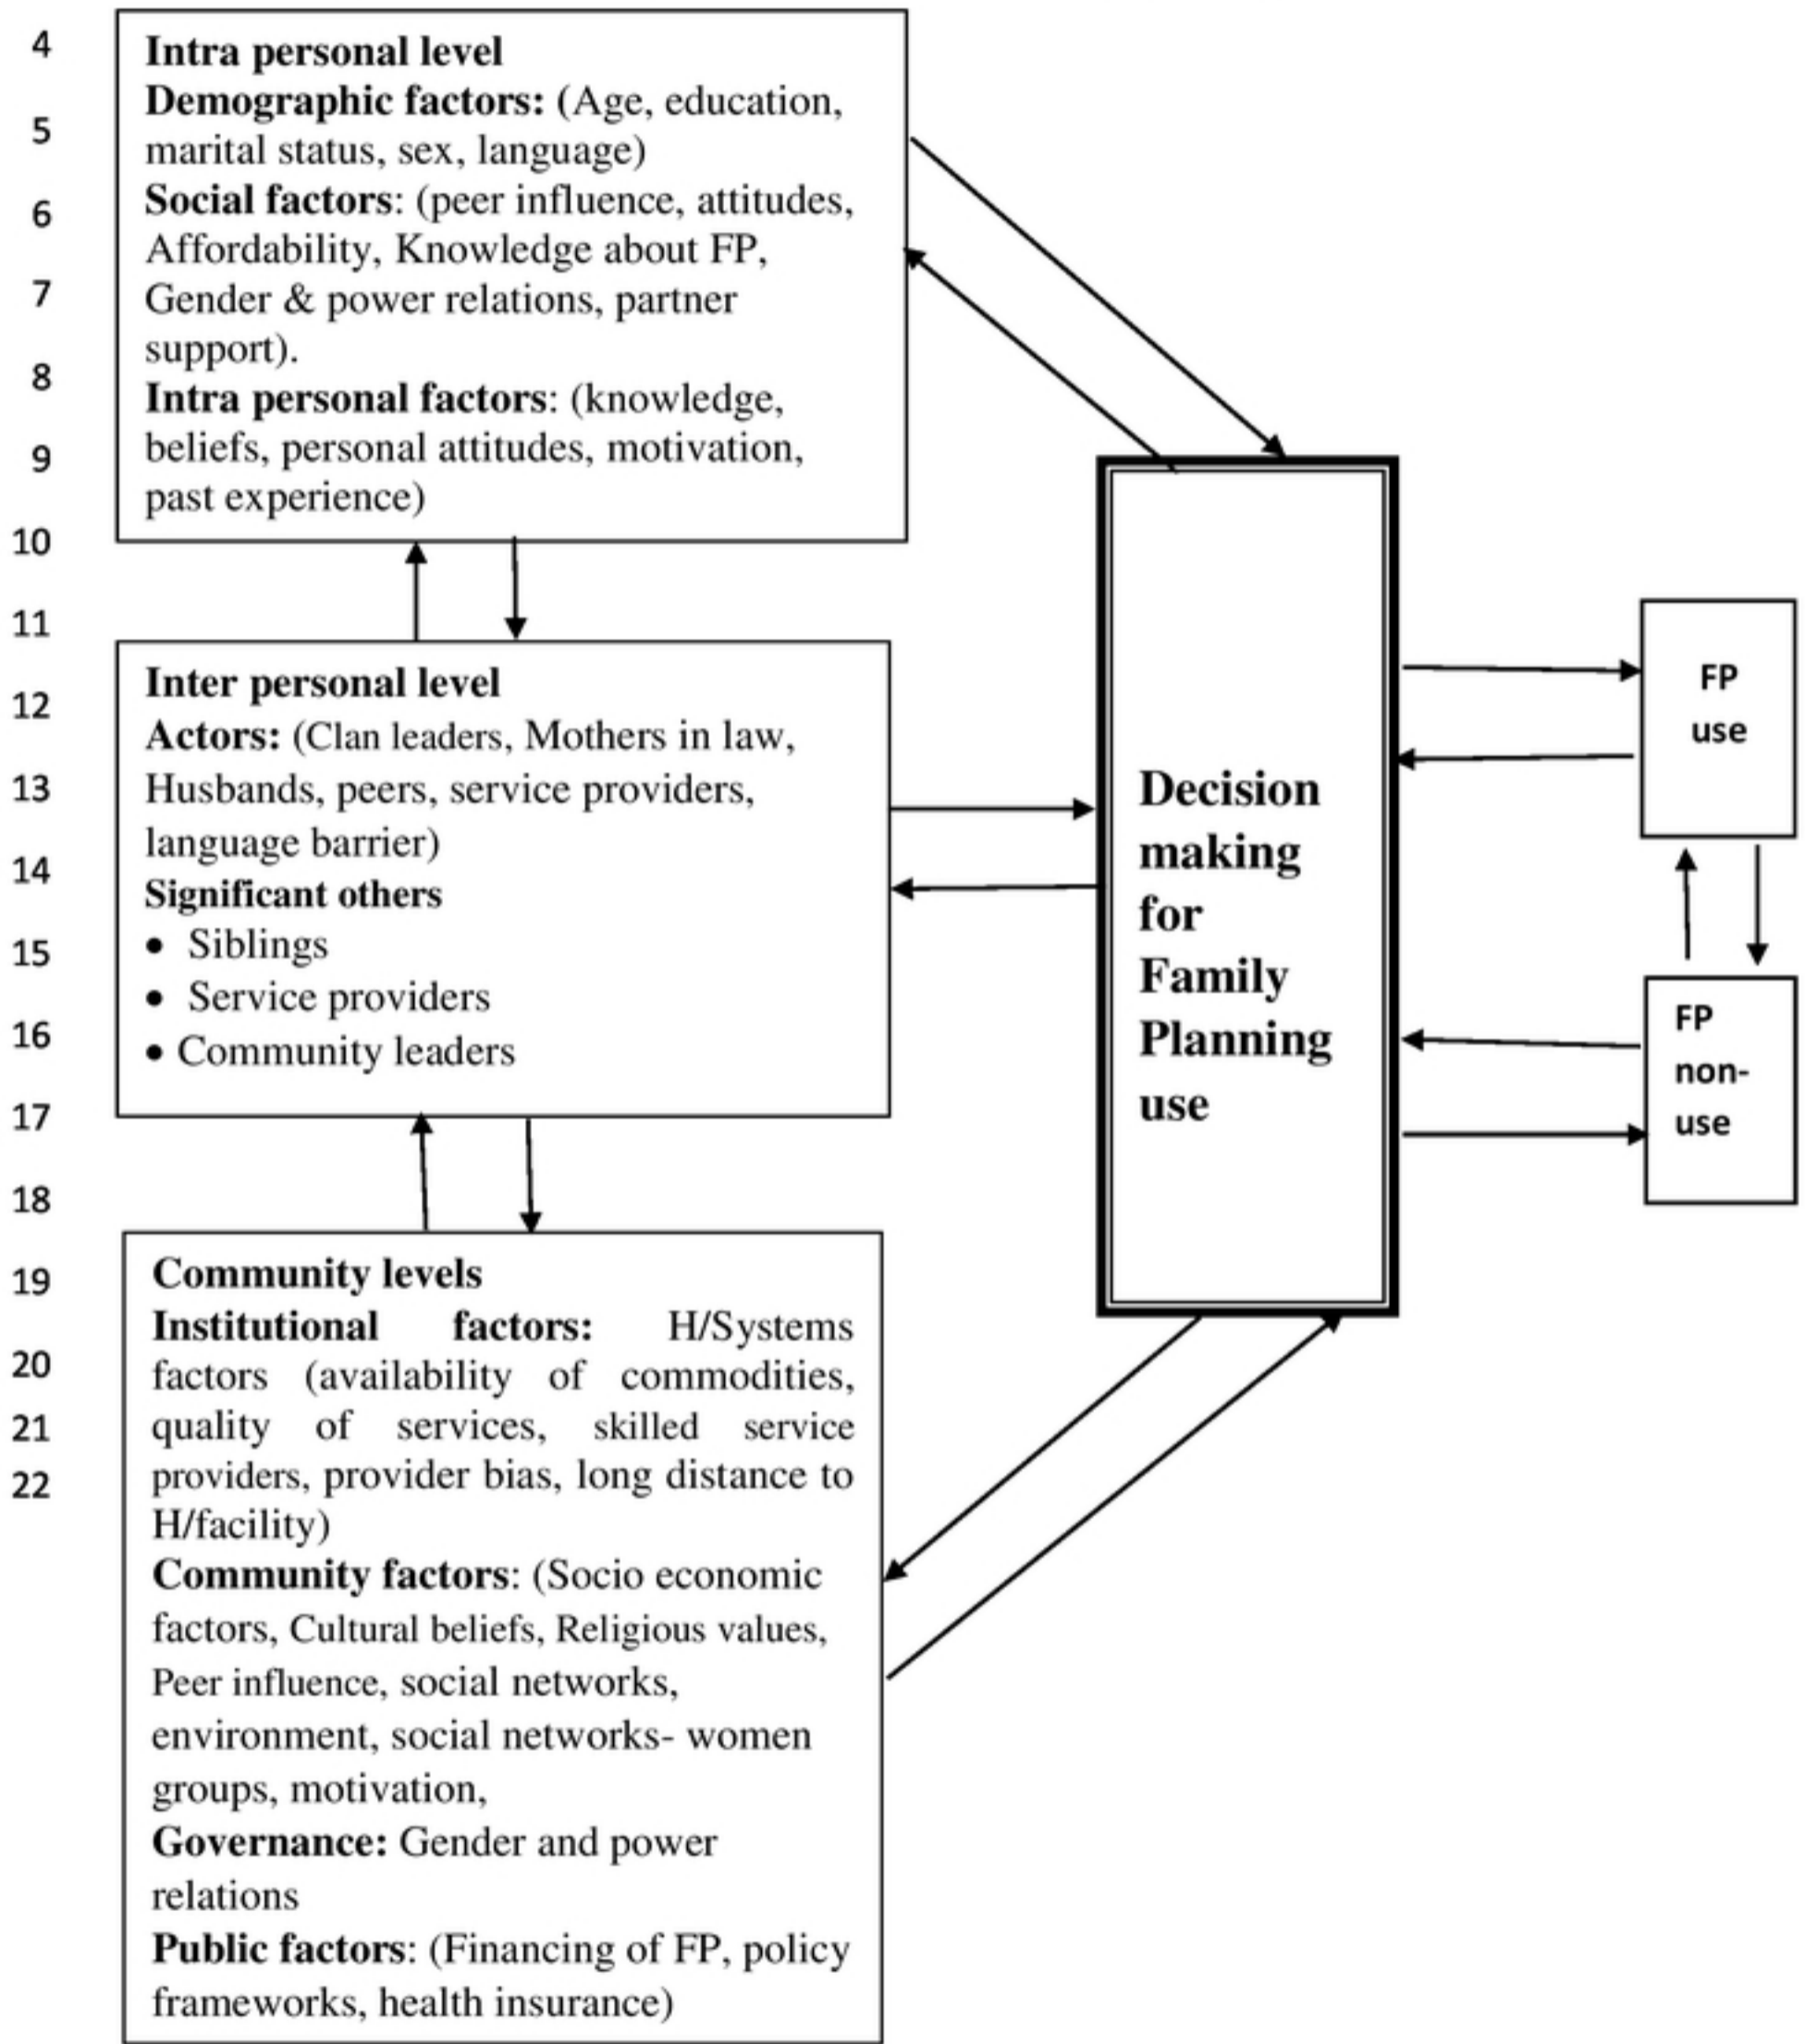

Source: https://medrxiv.org/content/medrxiv/early/2022/11/27/2022.11.23.22282662.full.pdf
